# Supplementary material
Source: publisher figshare collection journal article supplement (https://acs.figshare.com/ndownloader/files/27072865)
Supplement: Supplementary file 1 [file 27072865]

# Supporting Information

Olivier Adjoua,<sup>†</sup> Louis Lagardère\*,<sup>‡,‡</sup> Luc-Henri Jolly,<sup>‡</sup> Arnaud Durocher,<sup>¶</sup>  
Thibaut Very,<sup>§</sup> Isabelle Dupays,<sup>§</sup> Zhi Wang,<sup>||</sup> Théo Jaffrelot Inizan,<sup>†</sup> Frédéric  
Célerse,<sup>†,⊥</sup> Pengyu Ren,<sup>#</sup> Jay W. Ponder,<sup>||</sup> and Jean-Philip Piquemal\*,<sup>†,‡,#</sup>

<sup>†</sup>*Sorbonne Université, LCT, UMR 7616 CNRS, F-75005, Paris, France*

<sup>‡</sup>*Sorbonne Université, IP2CT, FR2622 CNRS, F-75005, Paris, France*

<sup>¶</sup>*Eolen, 37-39 Rue Boissière, 75116 Paris, France*

<sup>§</sup>*IDRIS, CNRS, Orsay, France*

<sup>||</sup>*Department of Chemistry, Washington University in Saint Louis, USA*

<sup>⊥</sup>*Sorbonne Université, CNRS, IPCM, Paris, France.*

<sup>#</sup>*Department of Biomedical Engineering, The University of Texas at Austin, USA*

E-mail: louis.lagardere@sorbonne-universite.fr, jean-philip.piquemal@sorbonne-universite.fr

## non PFF performance

The present package also proposes non-polarizable force fields simulation capabilities. The following Table displays the performances of the initial portage of the Tinker-HP CPUs subroutines for force fields like CHARMM, AMBER or OPLS (same scaling). We are currently working on the HPC optimization of these approaches but the present implementation already allow to perform production simulations.

Table 1: Tinker-*HP* Mixed Precision benchmarks (standard setup) with the Charmm Force-field on a single device with RESPA 2 fs (full flexibility, no shake

|             | DHFR | COX   | STMV |
|-------------|------|-------|------|
| V100 (ns/j) | 130  | 28.74 | 4.71 |
| RTX 2080 Ti | 95.5 | 14.34 | 2.37 |

## Comparison between device architectures

Given the device specifications, the overall computation analysis made with the Nvidia Profiler indicates a peak performance of 9, 8 and 5% respectively from GV100, RTX-2080 Ti and RTX 3090 after measuring the total number of Flops and duration on a 100 steps MP simulation. In other words, each of these devices performs on average 6 7 and 8 floating point operations after every access to a 32bits floating point from global memory. Thus, it remains possible to add extra computational instructions which is encouraging regarding future developments. For the current generation of Geforce *GPUs*, it seems that reaching peak performance will represent a considerable challenge as memory technologies do not evolve proportionally as processors.
